# Supplementary material
Source: Springer Nature journal article supplement (https://www.springermedizin.de/resource/supplementary/12885_2009_2099_MOESM4_ESM.pdf/9460524)

★  
'ATC GTCAA GGC ACTCT' GC ACTCTTAGCCTACGC  
★

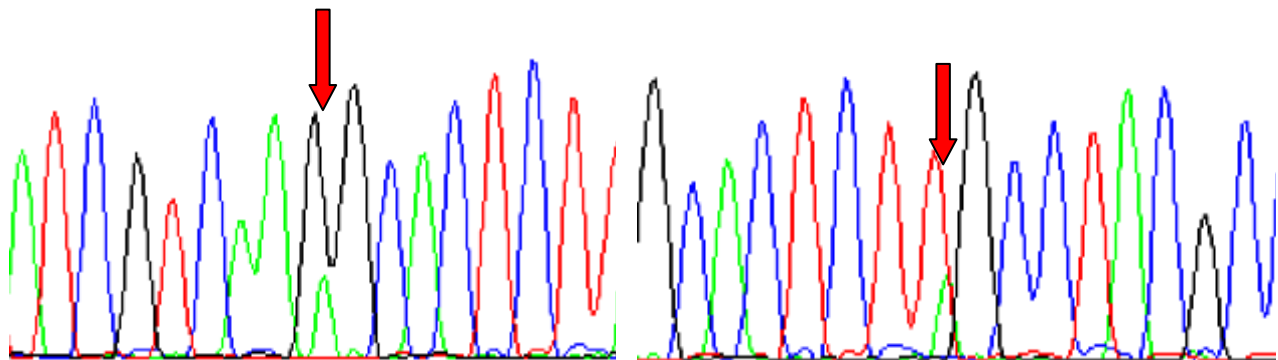

ATC GTCAA GGC ACTCTTAGCCTACGC

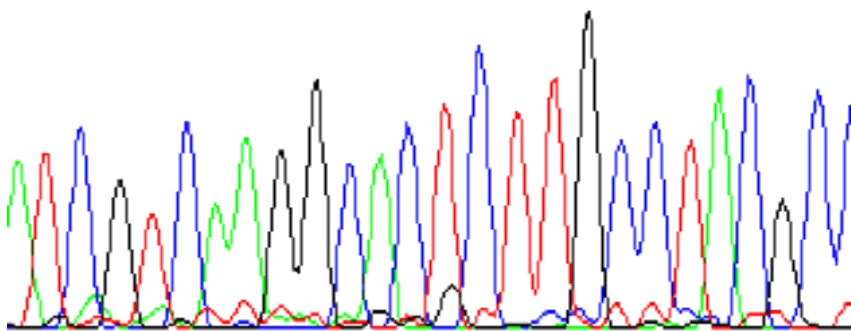

Supplement: MOESM4 [file 9460524]
